# Supplementary material for: Bivalent structure of a TNFR2-selective and agonistic TNF-α mutein Fc-fusion protein enhances the expansion activity of regulatory T cells
Source: Sci Rep. 2023 Aug 23;13:13762. doi: 10.1038/s41598-023-40925-9 (PMC10447426; doi:10.1038/s41598-023-40925-9)
Supplement: Supplementary file 1 — Supplementary Figures. [file 41598_2023_40925_MOESM1_ESM.pdf]

Supplementary Fig. S1

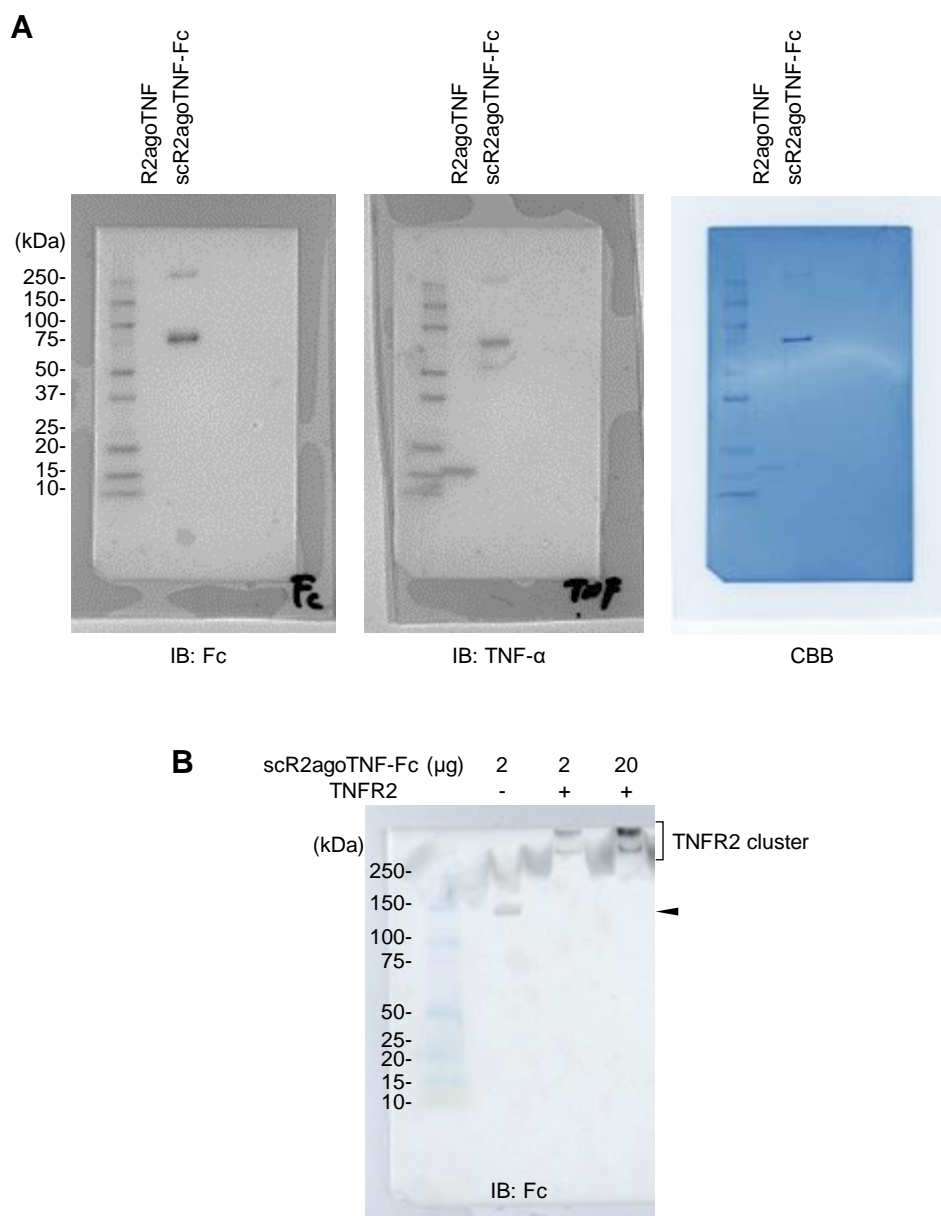

**Supplementary Fig. S1 Full-length blots in Fig. 1D and 1H**  
 (A) Original blots of Fig. 1D. (B) Original blot of Fig. 1H.

Supplementary Fig. S2

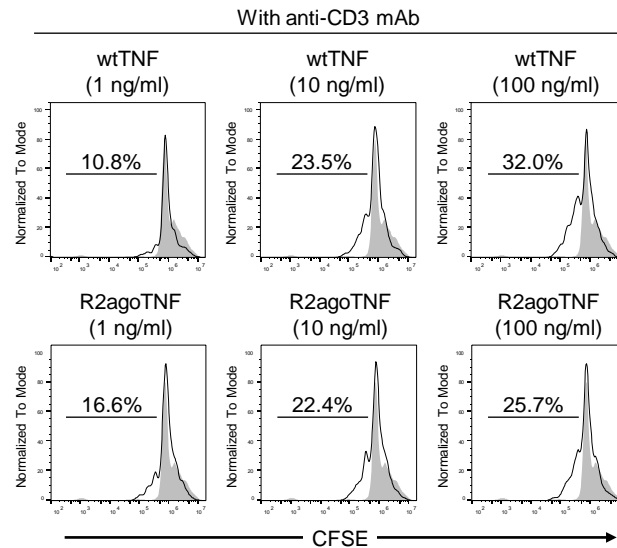

**Supplementary Fig. S2 *Ex vivo* Treg expansion by wtTNF and R2agoTNF.**

CD4<sup>+</sup>CD25<sup>+</sup> Tregs isolated from the LNs of WT mice were labeled with CFSE (3  $\mu$ M) using a CellTrace CFSE Cell Proliferation Kit (Thermo Fisher Scientific). To compare the proliferation rates of molecules, CFSE-labeled Tregs ( $5 \times 10^4$  cells/well) were cultured with soluble wtTNF (1, 10 and 100 ng/ml) or R2agoTNF (1, 10 and 100 ng/ml) in a U-bottom 96-well plate for 72 h under stimulation with immobilized anti-mouse CD3 $\epsilon$  mAb (0.5  $\mu$ g/ml). After cell collection, cell division was measured by CFSE attenuation using FCM. Both wtTNF and R2agoTNF expand Tregs *ex vivo* in a concentration-dependent manner.

Supplementary Fig. S3

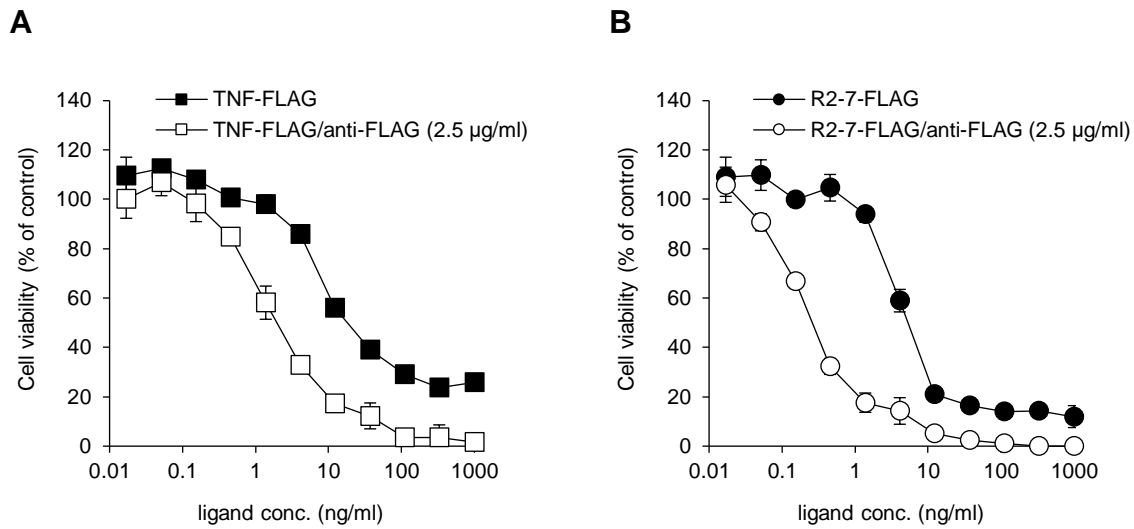

**Supplementary Fig. S3 Enhancing TNFR2 agonist activity by dimerization or multimerization.**

Human TNFR2/Fas preadipocytes ( $1.5 \times 10^4$  cells/well) were cultured with serially-diluted recombinant human TNF-FLAG (A) or R2-7-FLAG (B) with or without anti-FLAG-tag mAb (2.5 µg/ml). The antibody was added for dimerization or oligomerization of FLAG-tagged ligand. After incubation for 48 h at 37°C, cell viability was measured by a WST-8 colorimetric assay (Cell Counting Kit-8, Dojindo Laboratories). Both TNF-FLAG and R2-7-FLAG induced cell death in a concentration-dependent manner. Furthermore, anti-FLAG-tag mAb enhanced the cytotoxicity.

Supplementary Fig. S4

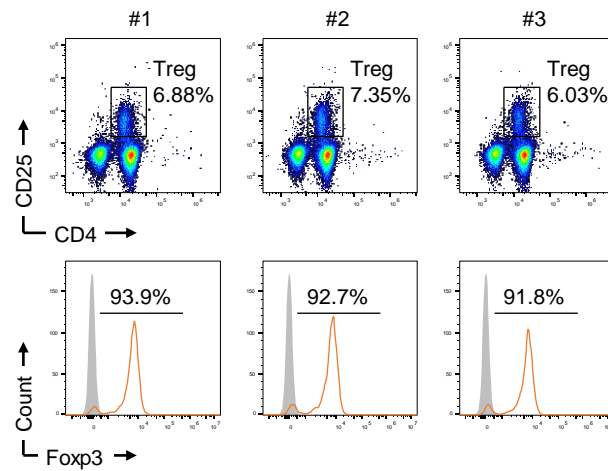

**Supplementary Fig. S4 Foxp3 expression in CD4<sup>+</sup>CD25<sup>+</sup> Tregs**

After cell preparation from lymph nodes of C57BL/6 (n=3), cells ( $1 \times 10^6$  cells) were stained with fluorescent-labeled anti-mouse molecule antibodies: CD4 (RM4-5)/PerCP, CD25 (PC61)/BV421 and Foxp3 (FJK-16s)/APC. The Foxp3/Transcription Factor Staining Buffer Set (Thermo Fisher Scientific) was used for staining according to the manufacturer's protocol. The cell population was measured by FCM. Histograms show Foxp3 expression level in CD4<sup>+</sup>CD25<sup>+</sup> Tregs. More than 90% of CD4<sup>+</sup>CD25<sup>+</sup> Tregs were Foxp3<sup>+</sup> cells.
